# Supplementary material for: Can STEreotactic Body Radiation Therapy (SBRT) Improve the Prognosis of Unresectable Locally Advanced Pancreatic Cancer? Long-Term Clinical Outcomes, Toxicity and Prognostic Factors on 142 Patients (STEP Study)
Source: MDPI journal article supplement (doi:10.3390/curroncol30070513), 2023-07-24
Supplement: s1 [file s1]

| Table S1. Multivariable analysis |      |             |         |    |       |         |    |       |   |
|----------------------------------|------|-------------|---------|----|-------|---------|----|-------|---|
|                                  | HR   | 95%CI       | P value | HR | 95%CI | P value | HR | 95%CI |   |
| Age > 70y                        | 1.17 | 0.77 – 1.78 | 0.447   | -  | -     | -       | -  | -     | - |
| CT before SBRT                   | 0.73 | 0.46 – 1.15 | 0.183   | -  | -     | -       | -  | -     | - |
| CT after SBRT                    | 0.76 | 0.49 – 1.19 | 0.239   | -  | -     | -       | -  | -     | - |
